# Supplementary material for: Selecting the Appropriate Downstaging and Bridging Therapies for Hepatocellular Carcinoma: What Is the Role of Transarterial Radioembolization? A Pooled Analysis
Source: MDPI journal article supplement (doi:10.3390/cancers15072122), 2023-04-02
Supplement: s1 [file s1]

**Supplementary Table S1** Inclusion criteria for TARE before LT

| <b>Downstaging</b>        |                                                                                                                                                                                                                                                                                                                                                                                                         |
|---------------------------|---------------------------------------------------------------------------------------------------------------------------------------------------------------------------------------------------------------------------------------------------------------------------------------------------------------------------------------------------------------------------------------------------------|
| Iñarrairaegui et al. [13] | Progress on prior TACE; not good candidates for TACE; expected tumor response with segmental radioembolization; Child-Pugh class A; ECOG 0-2; absence of distant metastases; uncorrectable risk of microspheres misplacement into the GI tract                                                                                                                                                          |
| Pracht et al. [14]        | Unilobar disease; portal vein thrombosis                                                                                                                                                                                                                                                                                                                                                                |
| Gramenzi et al. [15]      | Child–Pugh class A/B; ECOG 0-1; Life-expectancy >3 months; bilirubin ≤2mg/dl; BCLC B/C; granulocyte count ≥1.5x10 <sup>9</sup> /L; platelet count ≥50 x10 <sup>9</sup> /L; tumor extension <50% of liver; no extrahepatic metastasis, previous radio- or chemotherapy, evidence of hp shunt >20% (99mTc-MAA) or evidence of 99mTc-MAA delivery to the stomach or duodenum after embolization of the GDA |
| Labgaa et al. [16]        | Unresectable HCC; multiple nodules confined to the liver; exclusive treatment of TARE without previous treatment other than TARE; MDT                                                                                                                                                                                                                                                                   |
| Mehta et al. [17]         | HCC exceeding Milan criteria but meeting one of the following (single lesion 5.1-8 cm, 2-3 lesions each ≤5 cm with the sum of the maximal tumor diameters ≤8 cm, 4-5 lesions each ≤3 cm with the sum of the maximal tumor diameters ≤8 cm; no vascular invasion); no extrahepatic disease; bilirubin ≤4 mg/dl; MDT                                                                                      |
| Serenari et al. [18]      | ECOG 0-1; Child-Pugh score ≤B7; portal vein thrombosis limited to the first-order portal branch; no macrovascular invasion or extrahepatic disease                                                                                                                                                                                                                                                      |
| Dhondt et al. [19]        | BCLC stage B, extended to patients with BCLC stage A HCC not amenable to ablation, partial hepatectomy, or transplant; less than 50% liver involvement; no extrahepatic disease, invasion of the main, right, or left portal vein; bilirubin ≤34 mmol/L, or ≤44 mmol/L in case of a single involved segment; Child-Pugh score ≤7.                                                                       |
| <b>Bridging</b>           |                                                                                                                                                                                                                                                                                                                                                                                                         |
| Mantry et al. [20]        | Unresectable disease; ECOG 0-2; platelets >60,000; creatinine <2 mg/dL; bilirubin <2 mg/dL; INR <1.2; no extrahepatic disease; contraindication to hepatic artery catheterization such as vascular abnormalities; no efractory ascites; uncorrectable flow to the GI tracts; shunt fraction of 20% or greater to the lung; MDT                                                                          |
| Radunz et al. [21]        | MDT                                                                                                                                                                                                                                                                                                                                                                                                     |
| Zori et al. [22]          | MDT                                                                                                                                                                                                                                                                                                                                                                                                     |
| <b>Mixed</b>              |                                                                                                                                                                                                                                                                                                                                                                                                         |
| Tohme et al. [23]         | ECOG 0-1; serum total bilirubin <2.0 mg/dL; adequate renal and hematologic function; no significant pulmonary shunting                                                                                                                                                                                                                                                                                  |
| Abdelfattah et al. [24]   | Surgically unresectable HCC; no extrahepatic disease or macrovascular invasion; Child-Pugh score <10; ECOG 0-2; platelet count >50 x 10 <sup>9</sup> /L; INR <1.5; creatinine <100 mmol/L; mapping angiography; stimated radiation doses to lungs >20 Gy in a single administration or 30 Gy in multiple administrations                                                                                |
| Ettorre et al. [25]       | Unresectable disease predominately involving the liver; granulocytes >1,500/mL; platelets >60,000/mL; total bilirubin ≤ 2.0 mg/dL; GOT/GPT/AP less than 5 times the upper limit of normal; forced expiratory volume in 1s >1 L; no pulmonary shunt greater than 20% of <sup>99m</sup> Tc-MAA, uncorrectable delivery to the GI tract or complete PVT; MDT                                               |
| Gabr et al. [26]          | MDT                                                                                                                                                                                                                                                                                                                                                                                                     |

TACE: trasarterial chemoembolization, ECOG: Eastern Cooperative Oncology Group, GI: gastrointestinal, BCLC: Barcelona Clinic Liver Cancer staging system, GDA: gastroduodenal artery, TARE: transarterial radioembolization, MDT: multidisciplinary team, HCC: hepatocellular carcinoma, INR: international normalised ratio; Gy: gray, GOT: glutamic-oxaloacetic transaminase, GPT: glutamate pyruvate transaminase, AP: alkaline phosphatase.

## Supplementary Table S2. Comparison with other therapies

TARE: transarterial radioembolization, TACE: chemoembolization, DEB: drug-eluting bead, LT: liver transplantation, AE: adverse event, BCLC: Barcelona Clinic Liver Cancer staging system, HCC:

|                      | Comparative treatments          | Effectiveness on HCC                                                                                                                                                                              | Adverse events                                                                                                                       | Outcomes                                                                                                                                                                          |
|----------------------|---------------------------------|---------------------------------------------------------------------------------------------------------------------------------------------------------------------------------------------------|--------------------------------------------------------------------------------------------------------------------------------------|-----------------------------------------------------------------------------------------------------------------------------------------------------------------------------------|
| <b>Downstaging</b>   |                                 |                                                                                                                                                                                                   |                                                                                                                                      |                                                                                                                                                                                   |
| Gramenzi et al. [15] | TARE (n=32) vs Sorafenib (n=32) | Downstaging allowing LT only occurred after TARE.                                                                                                                                                 | AEs were more frequent with sorafenib therapy: any grade AEs occurred in 91% sorafenib patients and in 59% TARE patients (p<0.0001). | In cirrhotic patients with intermediate-advanced or not otherwise treatable HCC, sorafenib and TARE provide similar survivals.                                                    |
| Mehta et al. [17]    | TARE (n=62) vs TACE (n=132)     | There were no differences in mRECIST response, probability of or time to successful downstaging, waitlist dropout or LT.                                                                          | -                                                                                                                                    | There was no significant difference in OS between TARE and TACE.                                                                                                                  |
| Dhondt et al. [19]   | TARE (n=32) vs DEB-TACE (n=34)  | -                                                                                                                                                                                                 | In the TARE arm, 39% experienced at least one serious AEs ≥ grade 3 compared with 53% in the DEB-TACE arm (p=0.47).                  | Resulted in superior tumor control and survival in participants with non-surgical BCLC stage A and B HCC.                                                                         |
| <b>Bridging</b>      |                                 |                                                                                                                                                                                                   |                                                                                                                                      |                                                                                                                                                                                   |
| Zori et al. [22]     | TARE (n=28) vs TACE (n=37)      | There were no statistical differences in baseline pre-LT characteristics and tumor recurrence. The mVI was seen in 3.6% explants in the TARE group compared with 27% in the TACE group (p=0.013). | -                                                                                                                                    | The TARE group required fewer LRTs (p=0.001) despite no difference in time on the transplant list. There was a trend toward improved 3-year survival in the TARE group (p=0.052). |
| <b>Mixed</b>         |                                 |                                                                                                                                                                                                   |                                                                                                                                      |                                                                                                                                                                                   |
| Ettorre et al. [25]  | TARE (n=22) vs non-TACE (n=121) | -                                                                                                                                                                                                 | -                                                                                                                                    | The OS and FS analysis after LT between TARE and non-TARE were not significant (p=0.113, p=0.897, respectively).                                                                  |
| Gabr et al. [26]     | TARE (n=93) vs TACE (n=79)      | A biological response assessed by AFP decrease was observed in both groups with being more pronounced in the Y90 group.                                                                           | -                                                                                                                                    | Despite longer time to LT for TARE (p=0.0215), post-LT outcomes were similar between patients with TACE and TARE (p=0.5654).                                                      |

hepatocellular carcinoma, AFP: alpha-fetoprotein, OS: overall survival, FS: free survival
